# Supplementary material for: Helping ourselves, helping others: the Young Women’s Breast Cancer Study (YWS) – a multisite prospective cohort study to advance the understanding of breast cancer diagnosed in women aged 40 years and younger
Source: PubMed Central journal article supplement — BMJ Open. 2024 Jul 1;14(6):e081157. doi: 10.1136/bmjopen-2023-081157 (PMC11218027; doi:10.1136/bmjopen-2023-081157), 2024-07-01
Supplement: bmjopen-2023-081157supp001.pdf [file bmjopen-2023-081157supp001.pdf]

**SUPPLEMENTAL MATERIAL**

**Cohort profile: Helping Ourselves, Helping Others - The Young Women's Breast Cancer Study (YWS): A multi-site prospective cohort study to advance the understanding of breast cancer diagnosed in women aged 40 and younger**

**Supplemental Tables: 2**

**Supplemental Table 1. YWS enrollment sites**

| Site                                                                   | State/Country | Number Enrolled |
|------------------------------------------------------------------------|---------------|-----------------|
| Dana-Farber Cancer Institute/Brigham and Women's Hospital <sup>a</sup> | MA            | 669             |
| Beth Israel Deaconess Medical Center <sup>a</sup>                      | MA            | 50              |
| Cape Cod Hospital <sup>b</sup>                                         | MA            | 19              |
| Faulkner Hospital <sup>a</sup>                                         | MA            | 47              |
| Lowell General Hospital <sup>b</sup>                                   | MA            | 11              |
| Massachusetts General Hospital <sup>a</sup>                            | MA            | 256             |
| Mayo Clinic <sup>a</sup>                                               | MN            | 35              |
| Milford Hospital <sup>b</sup>                                          | MA            | 1               |
| Newton-Wellesley Hospital <sup>b</sup>                                 | MA            | 30              |
| North Shore Cancer Center (Salem) <sup>b</sup>                         | MA            | 21              |
| South Shore Hospital <sup>b</sup>                                      | MA            | 9               |
| Sunnybrook Health Sciences <sup>a</sup>                                | Canada        | 62              |
| University of Colorado Hospital <sup>a</sup>                           | CO            | 92              |

<sup>a</sup>academic sites <sup>b</sup>community sites

YWS, Young Women's Breast Cancer Study; MA, Massachusetts; MN, Minnesota; CO, Colorado

**Supplemental Table 2. YWS Blood Specimens Collected**

| <b>Number of Collections</b> | <b>Patients (N)</b> | <b>Baseline</b> | <b>1 year</b> | <b>4 year</b> |
|------------------------------|---------------------|-----------------|---------------|---------------|
| <b>1 Timepoint</b>           | N=71                |                 |               |               |
|                              | N=137               |                 |               |               |
|                              | N=23                |                 |               |               |
| <b>2 Timepoints</b>          | N=247               |                 |               |               |
|                              | N=44                |                 |               |               |
|                              | N=132               |                 |               |               |
| <b>3 Timepoints</b>          | N=471               |                 |               |               |
| <b>Total/Timepoint</b>       |                     | N=833           | N=987         | N=670         |
